# Supplementary material
Source: publisher figshare collection journal article supplement (https://acs.figshare.com/ndownloader/files/3736792)
Supplement: Supplementary file 1 [file 3736792]

## Supporting Information

---

# **Verification of Radicals Formation in Ethanol–Water Mixture Based Solution Plasma and Their Relation to the Rate of Reaction**

Tomohito Sudare<sup>1</sup>, Tomonaga Ueno<sup>1,2,4</sup>, Anyarat Watthanaphanit<sup>1,3</sup>, Nagahiro Saito<sup>1,2,3,4,\*</sup>

<sup>1</sup>Graduate School of Engineering, Nagoya University, Furo-cho, Chikusa-ku, Nagoya 464-8603, Japan

<sup>2</sup>Green Mobility Collaborative Research Center, Nagoya University, Furo-cho, Chikusa-ku, Nagoya 464-8603, Japan

<sup>3</sup>Institute of Innovation for Future Society, Nagoya University, Furo-cho, Chikusa-ku, Nagoya 464-8603, Japan

<sup>4</sup>Core Research for Evolutional Science and Technology (CREST), Japan Science and Technology Agency (JST), Saitama 332-0012, Japan

### **CORRESPONDING AUTHOR**

E-mail: [hiro@rd.numse.nagoya-u.ac.jp](mailto:hiro@rd.numse.nagoya-u.ac.jp)

Telephone: +81-52-789-3259

### Reaction rate of reduction reaction of trivalent gold ions

In order to clarify the dependence of reaction rate for reducing trivalent gold ions as a precursor of gold nanoparticles on ethanol concentration, the period when initial concentration of gold ions decrease to half value ( $t_{1/2}$ ) was investigated as previously reported.  $t_{1/2}$  value at respective ethanol mole fraction ( $\chi_{\text{ethanol}}$ ) is listed in Table S1.

**Table S1.** The pseudo-first order rate constant ( $k_{\text{obs}}$ ) for the reduction of gold chloride ions to AuNPs as a function of ethanol mole fraction ( $\chi_{\text{ethanol}}$ ) in the ethanol-water mixture.

| $\chi_{\text{ethanol}}$ | $t_{1/2}$ (s) |
|-------------------------|---------------|
| 0                       | 1480          |
| 0.042                   | 84            |
| 0.065                   | 58            |
| 0.089                   | 44            |
| 0.14                    | 64            |
| 0.21                    | 97            |
| 0.37                    | 185           |
| 0.61                    | 235           |

$$\frac{t_{1/2} \text{ at } \chi_{\text{ethanol}} 0}{t_{1/2} \text{ at } \chi_{\text{ethanol}} 0.089} = 35.2$$

### Detailed information about the effect of added KBr

**Table S2.** Concentration of the added KBr and electrical conductivity of the ethanol-water mixtures before and after the plasma discharge, as a function of ethanol mole fractions ( $\chi_{\text{ethanol}}$ ).

| $\chi_{\text{ethanol}}$ | concentration of the added KBr (mM) | electrical conductivity ( $\mu\text{S cm}^{-1}$ ) |           |
|-------------------------|-------------------------------------|---------------------------------------------------|-----------|
|                         |                                     | before SPP                                        | after SPP |
| 0                       | 0.8                                 | 150                                               | 153       |
| 0.042                   | 0.9                                 | 149                                               | 152       |
| 0.065                   | 1.1                                 | 151                                               | 154       |
| 0.089                   | 1.2                                 | 147                                               | 150       |
| 0.14                    | 1.35                                | 149                                               | 152       |
| 0.21                    | 1.42                                | 150                                               | 152       |
| 0.37                    | 1.57                                | 151                                               | 153       |
| 0.61                    | 1.68                                | 149                                               | 150       |

**Table S3.** The dependence of integral intensity of ESR spectra of DMPO-H, DMPO-OH, and DMPO-CH(CH<sub>3</sub>)OH on added KBr concentration (~3 mM) in ethanol-water mixture at  $\chi_{\text{ethanol}}$  of 0 and 0.089, respectively.

| concentration of the added KBr (mM) | $\chi_{\text{ethanol}}$ : 0 |         |                             | $\chi_{\text{ethanol}}$ : 0.089 |         |                             |
|-------------------------------------|-----------------------------|---------|-----------------------------|---------------------------------|---------|-----------------------------|
|                                     | DMPO-H                      | DMPO-OH | DMPO-CH(CH <sub>3</sub> )OH | DMPO-H                          | DMPO-OH | DMPO-CH(CH <sub>3</sub> )OH |
| 1 mM                                | 403                         | 526     | 0                           | 176                             | 124     | 743                         |
| 2 mM                                | 411                         | 523     | 0                           | 159                             | 127     | 755                         |
| 3 mM                                | 412                         | 514     | 0                           | 183                             | 132     | 738                         |

## Optical emission spectroscopy

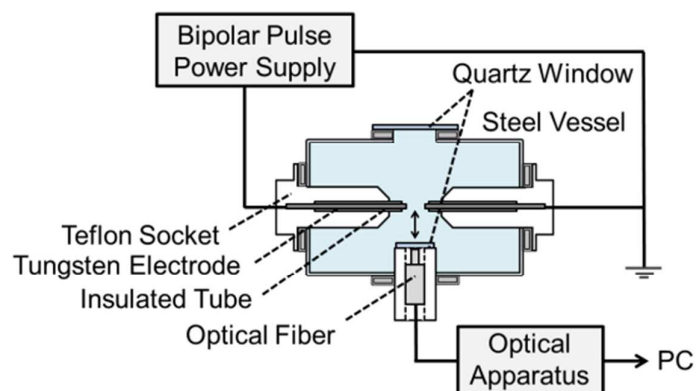

**Figure S1.** Experimental setup for OES measurement.

## Gas chromatography

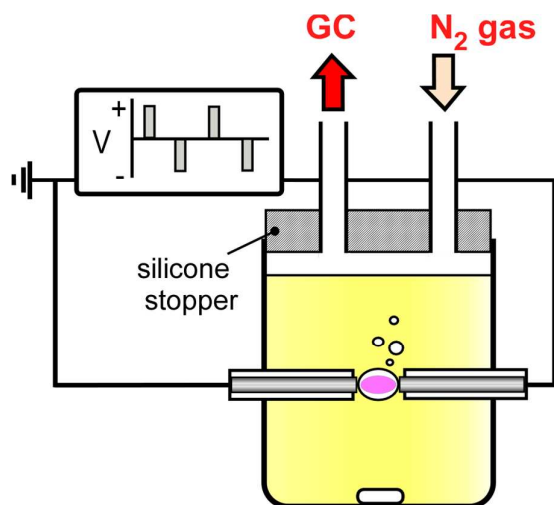

**Figure S2.** Experimental apparatus for gas chromatography (GC) measurement.

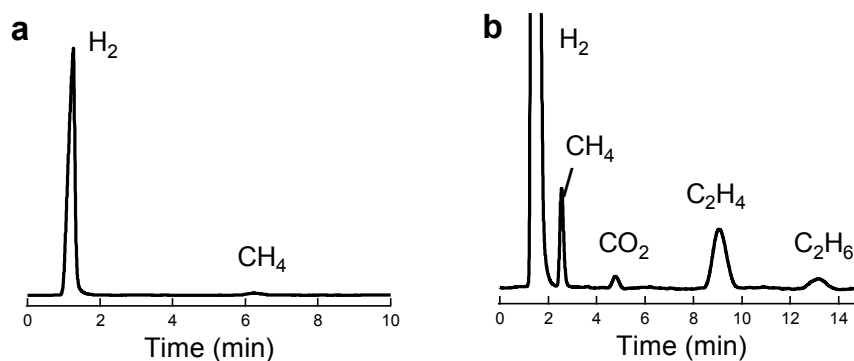

**Figure S3.** Chromatograms of the produced gases from solution plasma in ethanol-water mixture at  $\chi_{\text{ethanol}} = 0.37$  by using (a) molecular sieve 5A 60/80 and (b) Porapak Q 80/100 as analytical columns.

### Computer simulation of ESR spectra

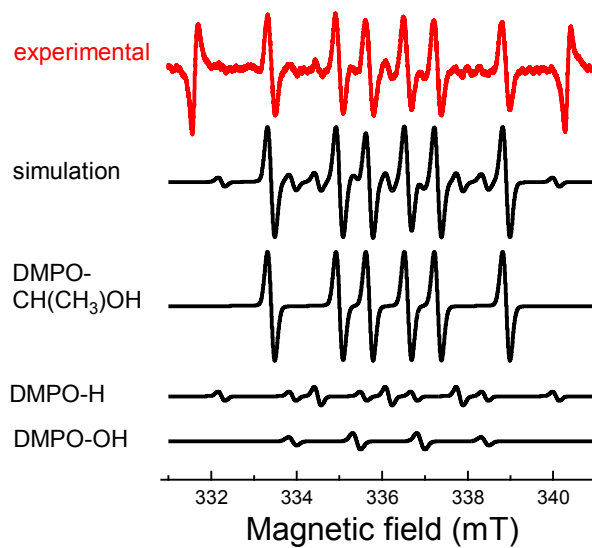

**Figure S4.** Computer-based simulations of the spin trap adduct spectra based upon the ethanol mole fraction ( $\chi_{\text{ethanol}}$ ) of 0.042.

### Correlation between reaction rate of reducing gold ions and radicals detected by ESR measurement in present study

Previously, overall reduction reaction of gold ions to AuNPs (from trivalent to zerovalent gold ions) by the SPP in water was reported.<sup>R1</sup> The equation is shown below, where hydrogen radicals ( $\text{H}\cdot$ ) play a crucial role as reducing agent.

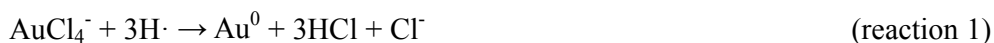

In the case of adding ethanol, the following reaction is added from the result of ESR measurement.

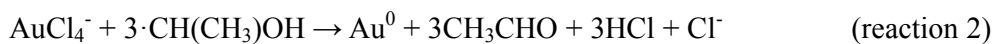

We confirmed the hydroxyethyl radicals ( $\cdot\text{CH}(\text{CH}_3)\text{OH}$ ) are a main reducing agent for the reduction rate of gold chloride ions by observing the correlation between  $t_{1/2}$  value (see Table S1) and the integral intensity for ESR spectra of DMPO- $\text{CH}(\text{CH}_3)\text{OH}$  adducts (at  $\chi_{\text{ethanol}} = 0.042\text{--}0.61$ ).

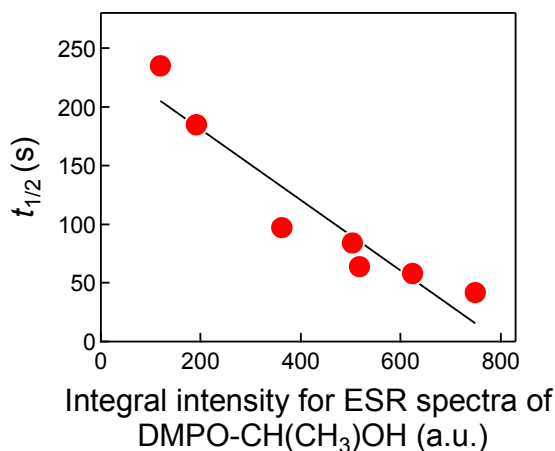

**Figure S5.** The correlation between  $t_{1/2}$  value and integral intensity for ESR spectra of DMPO adducts with hydroxyethyl radical in ethanol-water mixture at  $\chi_{\text{ethanol}}$  of 0.042–0.61.

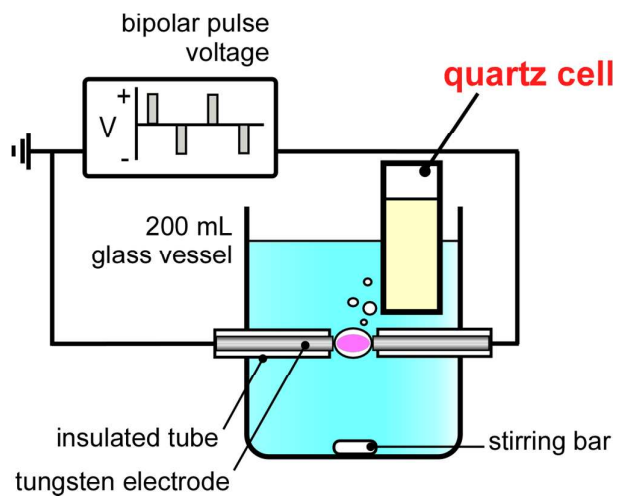

**Fig. S6** Experimental setup for the investigation of UV-light effect on the reduction reaction of gold ions.

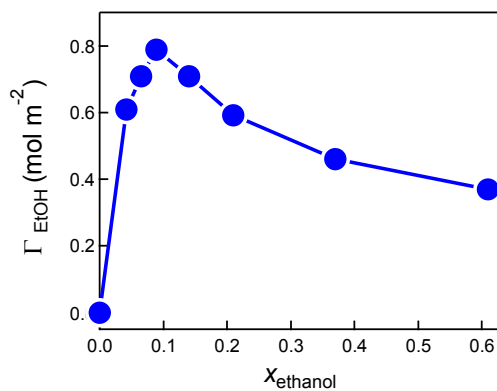

**Figure S7.** A profile of surface excess of ethanol as a function of ethanol mole fraction ( $\chi_{\text{ethanol}}$ ) in ethanol-water mixture.

#### Reference

R1 Bratescu, M. A.; Cho, S. P.; Takai, O.; Saito, N. Size-Controlled Gold Nanoparticles Synthesized in Solution Plasma. *J. Phys. Chem. C* **2011**, *115*, 24569–24576.
